# Supplementary material for: Chemiluminescence “turn-on” detection of tyrosinase activity via in situ generation of dopamine based on a lucigenin and riboflavin system
Source: Royal Society of Chemistry journal article supplement (doi:10.1039/d1nj05628j), 2022-01-01
Supplement: d1nj05628j1.pdf [file d1nj05628j1.pdf]

Electronic Supporting Materials (ESM):

## Chemiluminescence “Turn-on” Detection of Tyrosinase Activity via in Situ Generation of Dopamine Based on Lucigenin and Riboflavin System

Yi Wang,<sup>a</sup> Chengpei Du,<sup>a</sup> Ze Liu,<sup>b</sup> Kanglin Pei,<sup>a</sup> Yan Zhang,<sup>\*a</sup> Wenjing Qi<sup>\*a</sup>

<sup>a</sup>Chongqing Key Laboratory of Inorganic Functional Materials, College of Chemistry, Chongqing Normal University, Chongqing, 401331, PR China.

<sup>b</sup>Technology Center, China Tobacco Yunnan Industrial Co., Ltd., Kunming, 650231, PR China.

\*Corresponding authors. E-mail address: wenjingqi616@cqnu.edu.cn (W. Qi); yanzhang@cqnu.edu.cn (Y. Zhang)

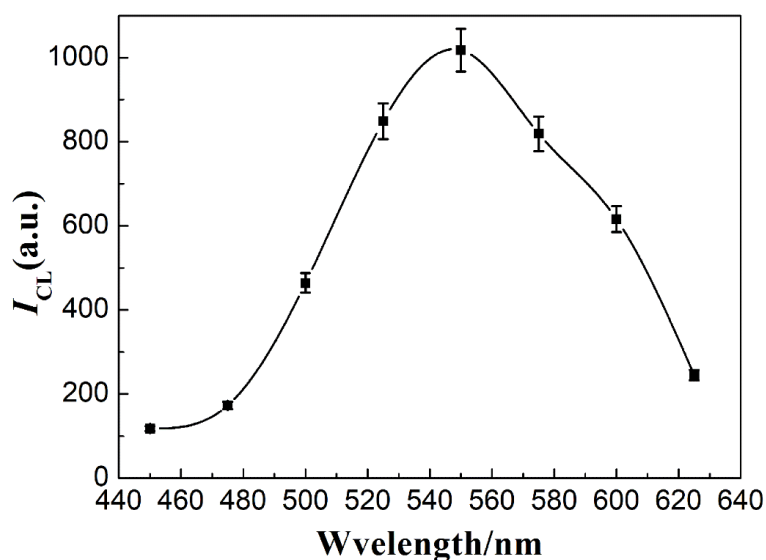

**Figure S1.** CL spectrum of lucigenin, riboflavin, tyramine and tyrosinase mixture.  $c(\text{lucigenin})$ : 2 mM;  $c(\text{riboflavine})$ : 0.5 mM;  $c(\text{tyramine})$ : 0.5 mM;  $c(\text{tyrosinase})$ : 15 U·mL<sup>-1</sup>; PMT voltage: 1000 V. All the error bars represent the standard deviation of three measurements.

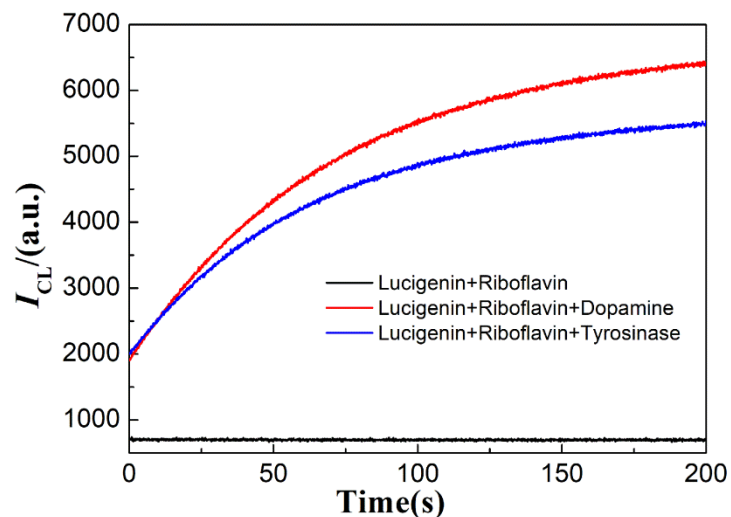

**Figure S2.** CL spectra of lucigenin and riboflavin (black line), lucigenin, riboflavin and tyrosinase (red line), lucigenin, riboflavin, and dopamine (blue line).  $c(\text{lucigenin})$ : 0.5 mM;  $c(\text{riboflavine})$ : 0.5 mM;  $c(\text{tyramine})$ : 0.5 mM;  $c(\text{tyrosinase})$ : 5 U·mL<sup>-1</sup>;  $c(\text{dopamine})$ : 0.2mM; PMT voltage: 800 V. All the error bars represent the standard deviation of three measurements.

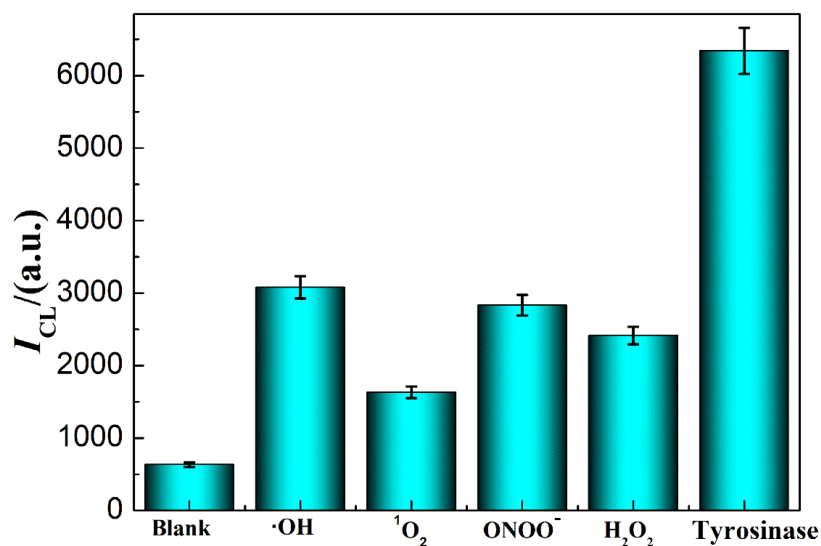

**Figure S3.** The Selectivity of CL “turn-on” detection of tyrosinase (Tyr) towards ROS (reactive oxygen species) and RNS (reactive nitrogen species).  $c(\text{lucigenin})$ : 0.5 mM;  $c(\text{riboflavine})$ : 0.5 mM;  $c(\text{tyramine})$ : 0.5 mM;  $c(\text{tyrosinase})$ : 5 U·mL<sup>-1</sup>; PMT voltage: 800 V. All the error bars represent the standard deviation of three measurements.
